# Supplementary material for: A protocol for a systematic literature review of economic evaluation studies of interventions to address antimicrobial resistance
Source: Springer Nature journal article supplement (doi:10.1186/s13643-021-01794-3), 2021-09-07
Supplement: MOESM1 [file 19640436]

## MEDLINE Search terms for AMR EE SLR

|            |                                                                                                                                                                                   |
|------------|-----------------------------------------------------------------------------------------------------------------------------------------------------------------------------------|
| 1.         | exp Economic Development/ or exp Models, Economic/ or exp Economic Competition/ or exp Inflation, Economic/ or exp Economic Recession/ or exp "fees and charges"/ or exp Budgets/ |
| 2.         | exp "costs and cost analysis"                                                                                                                                                     |
| 3.         | (economic* or pharmaco-economic* or "economic analysis" or "economic evaluation" or "economic stud*" or "economic modelling" or price* or pricing).mp.                            |
| 4.         | ("cost benefit" or "cost effective" or "cost analysis" or "cost minimisation" or "cost utility analysis" or "budget impact").mp.                                                  |
| 5.         | (cost or "cost description" or "cost saving" or "cost shar*" or "cost allocation").mp.                                                                                            |
| 6.         | ("deductibles and coinsurance" or (fiscal or funding or financial or finance)).tw.                                                                                                |
| 7.         | (health?care adj cost\$).mp.                                                                                                                                                      |
| 8.         | ((low adj cost) or (high adj cost)).mp.                                                                                                                                           |
| 9.         | (cost adj estimate*) or ((cost adj variable*) or (unit adj cost*)).mp.                                                                                                            |
| <b>10.</b> | <b>(1 or 2 or 3 or 4 or 5 or 6 or 7 or 8 or 9)</b>                                                                                                                                |
| 11.        | exp "Drug Resistance, Microbial"/ or exp "Antibiotic Resistance"/ or exp "Antibiotic Resistance, Microbial"/or exp "Antimicrobial Drug Resistance"                                |
| 12.        | ("antimicrobial drug resistan*" or "drug resistan*" or "antibiotic resistan*" or "antimicrobial resistan*" or "multi-drug resistan*").mp                                          |
| 13.        | ("antimicrobial drug resistan*" or "antibiotic resistan*" or "antimicrobial resistan*").tw                                                                                        |
| <b>14.</b> | <b>(11 or 12 or 13)</b>                                                                                                                                                           |
| <b>15.</b> | <b>(10 and 14)</b>                                                                                                                                                                |
| <b>16.</b> | <b>limit 15 to yr="2000 -Current"</b>                                                                                                                                             |
| <b>17.</b> | <b>limit 16 to english language</b>                                                                                                                                               |
